# Supplementary material for: Functional recovery and muscle atrophy in pre-clinical models of peripheral nerve transection and gap-grafting in mice: effects of 4-aminopyridine
Source: PubMed Central journal article supplement — Neural Regen Res. 2022 Jun 2;18(2):439–44. doi: 10.4103/1673-5374.346456 (PMC9396510; doi:10.4103/1673-5374.346456), 2022-06-02
Supplement: NRR-18-439_Suppl1.pdf [file NRR-18-439_Suppl1.pdf]

## Supplemental methods

### Mouse model of severe sciatic nerve crush injury

Sciatic nerve crush injury was performed as previously described by our lab (Tseng et al., 2016; Clark et al., 2019; Hsu et al., 2020). Briefly, after deep anesthesia with intraperitoneal (IP) injection of ketamine (100 mg/kg)/xylazine (10 mg/kg) mixture (supplied by animal care facility), the right hindlimb was shaved and prepared with alcohol swabs and McKesson 10% povidone-iodine solution (Cat# 854301PA, McKesson Corporation, NY, USA). Under a precision stereo zoom binocular microscope (Model PZMIII, World Precision Instruments, Sarasota, FL, USA), a lateral skin incision (~2.5 cm) was made along the length of the femur and the sciatic nerve (SN) was bluntly exposed through the iliotibial band. Crush injury was performed ~3 mm proximal to the SN trifurcation using a needle driver (3 mm tip width; RH2560, V. Mueller; Becton, Dickinson and Company, Franklin Lakes, NJ, USA) for 30 seconds. The skin was closed by surgical staples and post-operative slow release buprenorphine (0.05 mg/kg) was given subcutaneously to all animals as an analgesic. The experimental animals (9/group) were randomly assigned to intraperitoneal saline and different doses of 4-AP (10, 40, and 80  $\mu$ g per 20 g mouse). Functional recovery as sciatic function index (SFI) was assessed by walking track analysis before crush injury (baseline) and on post-injury days 3, 7, 14 and 21.

### References

- Clark AR, Hsu CG, Talukder MAH, Noble M, Elfar JC (2019) Transdermal delivery of 4-aminopyridine accelerates motor functional recovery and improves nerve morphology following sciatic nerve crush injury in mice. *Neural Regen Res* 15:136-144.
- Hsu CG, Talukder MAH, Yue L, Turpin LC, Noble M, Elfar JC (2020) Human equivalent dose of oral 4-aminopyridine differentiates nerve crush injury from transection injury and improves post-injury function in mice. *Neural Regen Res* 15:2098-2107.
- Tseng KC, Li H, Clark A, Sundem L, Zuscik M, Noble M, Elfar J (2016) 4-Aminopyridine promotes functional recovery and remyelination in acute peripheral nerve injury. *EMBO Mol Med* 8:1409-1420.
