# Supplementary material for: Functional recovery and muscle atrophy in pre-clinical models of peripheral nerve transection and gap-grafting in mice: effects of 4-aminopyridine
Source: PubMed Central journal article supplement — Neural Regen Res. 2022 Jun 2;18(2):439–44. doi: 10.4103/1673-5374.346456 (PMC9396510; doi:10.4103/1673-5374.346456), 2022-06-02
Supplement: NRR-18-439_Suppl2.pdf [file NRR-18-439_Suppl2.pdf]

## OPEN PEER REVIEW REPORT 1

**Name of journal:** Neural Regeneration Research

**Manuscript NO:** NRR-D-21-00457

**Title:** Functional recovery and muscle atrophy in pre-clinical models of peripheral nerve transection and gap-grafting in mice: Effects of 4-aminopyridine

**Reviewer's Name:** David Brogan

**Reviewer's country:** USA

### COMMENTS TO AUTHORS

The authors have performed a well done study analyzing the effects of 4-AP on nerve and muscle regeneration after nerve transection and repair. This builds on earlier data that they have published looking at the effects of 4-AP on neurogenic muscle atrophy after crush injury. The experimental methods are rigorous and widely accepted; the question posed is novel and interesting. I found the paper to be well written and methodologically sound. Overall, I think the discussion may benefit from a slightly different focus, but have relatively few criticisms. Some specific questions / suggestions include:

Interesting that the G5/7 group had less trouble walking - any thoughts as to why?

What do you make of the lack of effect of 4-AP on the SFI?

Shin has previously suggested that maximal muscle recovery in a rat model will be seen at 16 weeks - do you think there is any benefit to extending your analysis?

P. 12, line 19 - spelling error on isograft

p. 14, first paragraph - I'm not sure that this discussion adds much to the paper - we know that nerve grafting is inferior to primary repair. I would guess that the useful information your data provides is the effect, or lack there-of, of 4-AP on the isograft, and what, if any, difference 4-AP has on isograft vs primary repair.

Figure 3, 4 and 5 - where are the white asterisks?

I'm not sure Figure 5 offers much in the zoomed in sections on the right - what are you trying to convey?

Figures 6 and 7 are hard to visualize - do you have a higher resolution?
